# Supplementary material for: Homogeneous and heterogeneous dynamics in native and denatured bovine serum albumin
Source: Royal Society of Chemistry journal article supplement (doi:10.1039/c7cp08292d), 2018-01-01
Supplement: c7cp08292d1.pdf [file c7cp08292d1.pdf]

Supporting Information

# Homogeneous and Heterogeneous Dynamics in Native and Denatured Bovine Serum Albumin

Felix Ameseder<sup>†</sup>, Aurel Radulescu<sup>‡</sup>, Marina Khanef<sup>‡</sup>, Wiebke Lohstroh<sup>§</sup>, Andreas M. Stadler<sup>†,\*</sup>

<sup>†</sup> Jülich Centre for Neutron Science JCNS and Institute for Complex Systems ICS,  
Forschungszentrum Jülich GmbH, 52425 Jülich, Germany

<sup>‡</sup> Jülich Centre for Neutron Science JCNS, Forschungszentrum Jülich GmbH, Outstation at MLZ,  
85747 Garching, Germany

<sup>§</sup> Heinz Maier-Leibnitz Zentrum, Technische Universität München, 85747 Garching, Germany

\* corresponding author: [a.stadler@fz-juelich.de](mailto:a.stadler@fz-juelich.de)

Table S1: Dynamic parameters of native BSA obtained from fits based on stretched exponential functions for the description of internal dynamics. The values of  $R$  correspond to the measured Guinier radius by SAXS\*, the effective hydrodynamic radius determined from SAXS#, and the hydrodynamic radius determined by DLS<sup>§</sup> given in the literature<sup>1</sup>.  $R = 39 \text{ \AA}$  is the average value as determined from fits to the QENS data sets.

|         | R                                        | 30.2 $\text{\AA}^*$ | 36.2 $\text{\AA}^\#$ | 36.6 $\text{\AA}^\S$ | 39 $\text{\AA}^\S$ |
|---------|------------------------------------------|---------------------|----------------------|----------------------|--------------------|
| TOFTOF  | $\beta$                                  | 0.41 +/- 0.03       | 0.46 $\pm$ 0.03      | 0.42 $\pm$ 0.03      | 0.45 +/- 0.03      |
|         | $D_{\text{int}}(\text{\AA}^2/\text{ns})$ | 13.9 +/- 2.5        | 33.7 $\pm$ 3.8       | 30.4 $\pm$ 4.5       | 47.7 +/- 6.1       |
|         | $\chi$                                   | 1.78                | 1.78                 | 1.80                 | 1.73               |
| SPHERES | $\beta$                                  | 1                   | 1                    | 1                    | 1                  |
|         | $D_{\text{int}}(\text{\AA}^2/\text{ns})$ | 19.9 +/- 1.0        | 23.6 +/- 1.3         | 23.9 +/- 1.4         | 26.1 +/- 1.6       |
|         | $\chi$                                   | 1.61                | 1.63                 | 1.63                 | 1.65               |

Table S2: Dynamic parameters of native BSA obtained from fits based on the Brownian oscillator for the description of internal dynamics. Dependence of effective protein radius is reported. The values of  $R$  correspond to the measured Guinier radius by SAXS\*, the effective hydrodynamic radius determined from SAXS#, and the hydrodynamic radius determined by DLS<sup>§</sup>. The  $R$  values in the last column are fitted to the QENS data sets. The average value  $\langle R \rangle$  determined from the fits equals 39  $\text{\AA}$ .

|         | R                                        | 30.2 $\text{\AA}^*$ | 36.2 $\text{\AA}^\#$ | 36.6 $\text{\AA}^\S$ | 39 $\text{\AA}$ | $R_{\text{TOFTOF}} =$<br>49.1 +/- 0.4 $\text{\AA}$<br>$R_{\text{SPHERES}} =$<br>29.5 +/- 1.74 |
|---------|------------------------------------------|---------------------|----------------------|----------------------|-----------------|-----------------------------------------------------------------------------------------------|
| TOFTOF  | $D_{\text{int}}(\text{\AA}^2/\text{ns})$ | 68.5 +/- 1.2        | 83.8 +/- 1.5         | 86.0 +/- 1.6         | 95.8 +/- 1.8    | 140.9 +/- 3.9                                                                                 |
|         | RMSD ( $\text{\AA}$ )                    | 3.04 +/- 0.21       | 3.96 +/- 0.44        | 3.55 +/- 0.32        | 3.86 +/- 0.40   | 16.6 +/- 37.4                                                                                 |
|         | $p$                                      | 0.77 +/- 0.01       | 0.80 +/- 0.01        | 0.80 +/- 0.01        | 0.81 +/- 0.01   | 0.85 +/- 0.01                                                                                 |
|         | $\chi$                                   | 1.89                | 1.89                 | 1.86                 | 1.85            | 1.84                                                                                          |
| SPHERES | $D_{\text{int}}(\text{\AA}^2/\text{ns})$ | 16.9 +/- 0.8        | 21.3 +/- 1.2         | 21.6 +/- 1.2         | 24.5 +/- 1.5    | 16.50 +/- 1.08                                                                                |
|         | RMSD                                     | 3.25 +/-            | 3.22 +/- 0.50        | 3.22 +/- 0.50        | 3.23 +/- 0.53   | 3.26 +/- 0.47                                                                                 |
|         | $p$                                      | 0.56 +/- 0.01       | 0.61 +/- 0.01        | 0.62 +/- 0.01        | 0.64 +/- 0.01   | 0.55 +/- 0.02                                                                                 |
|         | $\chi$                                   | 1.64                | 1.64                 | 1.64                 | 1.65            | 1.64                                                                                          |

- 1 F. Roosen-Runge, M. Hennig, F. Zhang, R. M. J. Jacobs, M. Sztucki, H. Schober, T. Seydel and F. Schreiber, Protein self-diffusion in crowded solutions., *Proc. Natl. Acad. Sci. U. S. A.*, 2011, **108**, 11815–20.
